# Supplementary material for: Comparative Analyses of QTLs Influencing Obesity and Metabolic Phenotypes in Pigs and Humans
Source: PubMed Central journal article supplement (PMC4562524; doi:10.1371/journal.pone.0137356), 2015-09-08

### Decay of average $r^2$ over distance

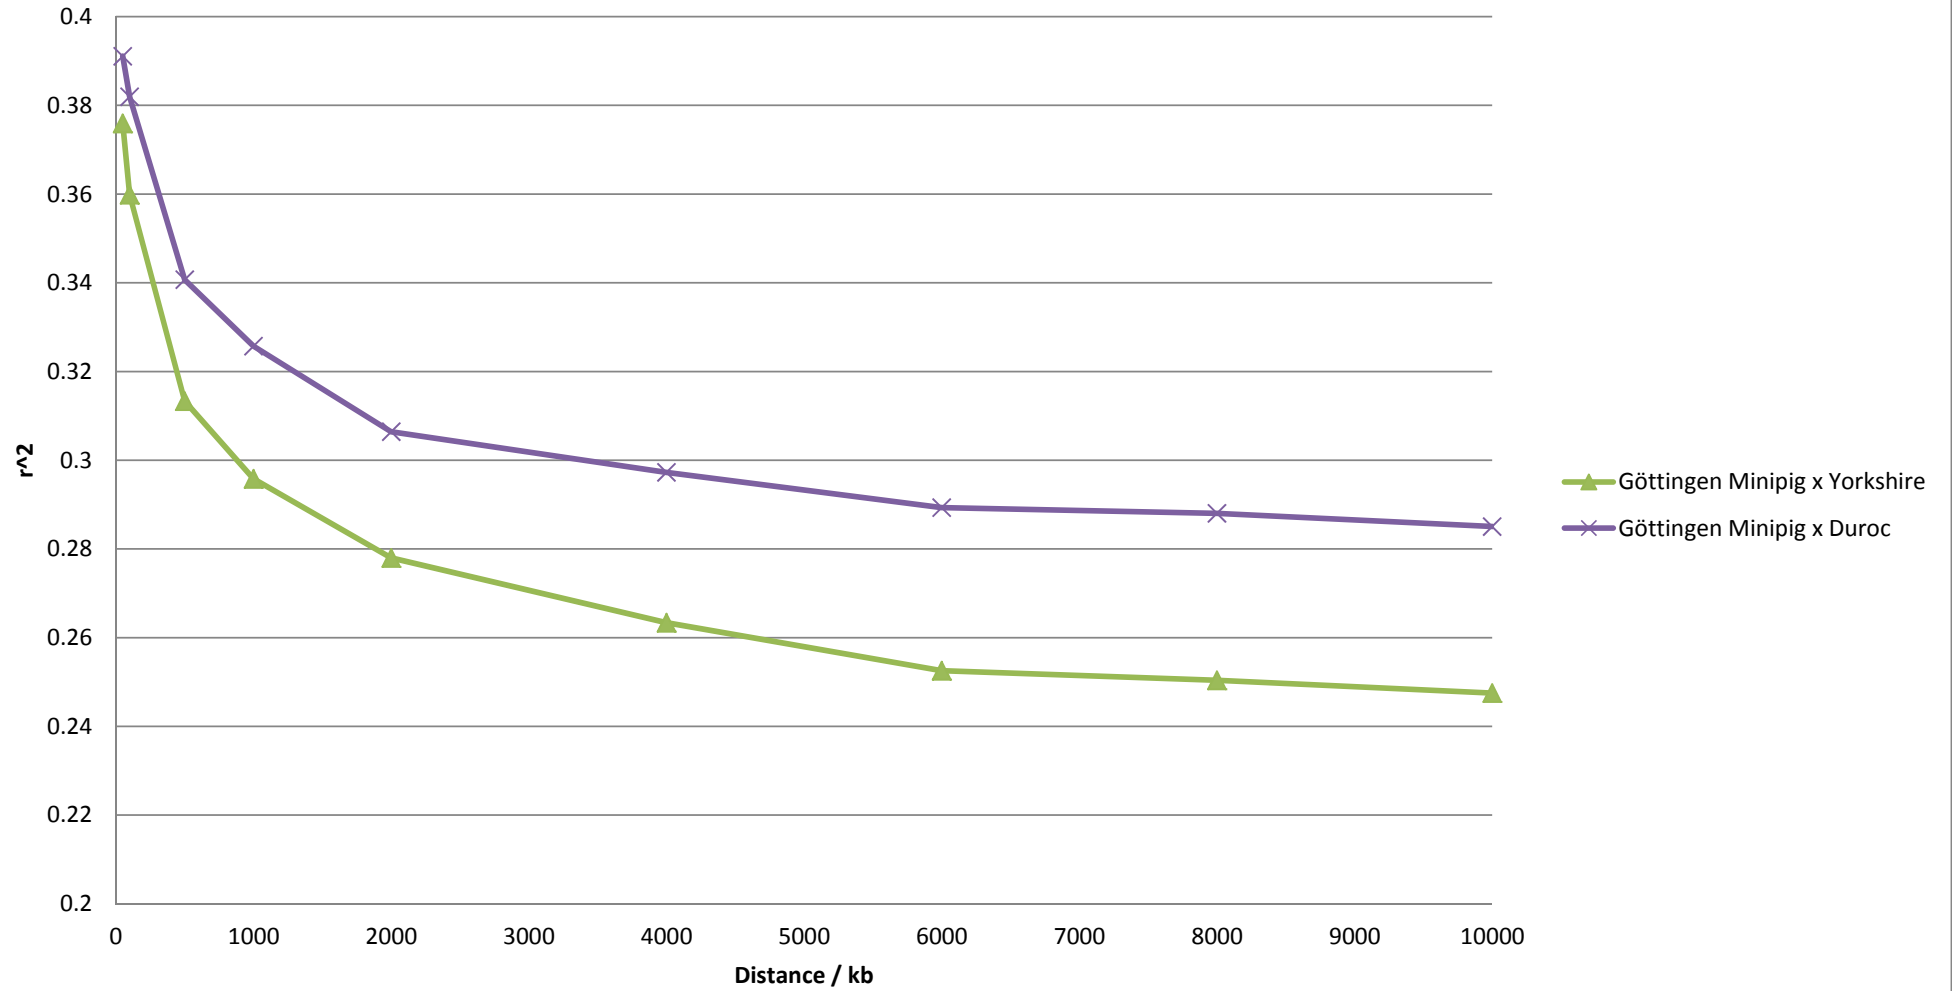

Supplement: pone.0137356.s001.pdf [file pone.0137356.s001.pdf]
